# Supplementary material for: Alterations in mitochondrial dynamics with age‐related Sirtuin1/Sirtuin3 deficiency impair cardiomyocyte contractility
Source: PubMed Central journal article supplement (PMC8282250; doi:10.1111/acel.13419), 2021-07-03
Supplement: ACEL-20-e13419-s001.pdf [file ACEL-20-e13419-s001.pdf]

## **Alterations in mitochondrial dynamics with age-related sirtuin1/sirtuin3 deficiency impair cardiomyocyte contractility**

Jingwen Zhang | Zhibin He | Julia Fedorova | Cole Logan | Lauryn Bates | Kayla Davitt | Van Le |  
Jiayuan Murphy | Melissa Li | Mingyi Wang | Edward G. Lakatta | Di Ren | Ji Li

### **1 | Supplementary Methods**

#### **1.1 | Nonhuman primate studies**

The snap-frozen Left ventricular tissue for western blotting was harvested from young (n =4, a range of age: from 8.87 to 14.12 yrs; average = 10.84 yrs) and aged (n=5, a range of age: from 18.81 to 26.48 yrs; average=22.4 yrs) male rhesus monkeys (*Macaca mulatta*) from NIA. All these monkeys were on a standard diet (CD, Harlan, Cat. No. TD 02498) (<http://grantome.com/grant/NIH/ZIA-AG000238-09>) (M. Wang, Lakatta, E.G., 2019)

#### **1.2 | Immunoblotting**

Immunoblotting was performed as previously described. SIRT1 (H300) from Santa cruz Biotechnology, Inc was used for monkey samples, and rabbit polyclonal antibody against SIRT1 (ab12193) from Abcam (MitoSciences-Abcam, Eugene, OR) was used for H9c2 cell samples. SIRT3 (#5490), OPA1 (#80471), Drp1 (#8570), and GAPDH (#2118) from Cell signaling (Danvers, MA). COXIV (COX4) (NB110-39115), mitofusion1 (MFN1) (NBP1-51841) and mitofusion2 (MFN2) (NBP2-17298) from Novus Biologicals (Littleton, CO) were purchased and used according to protocols provided by the manufacturer.

#### **1.3 | Transient transfection with small interfering RNA (siRNA)**

To knockdown the endogenous SIRT1 and SIRT3, H9c2 cells were transiently transfected with 100 nM siRNAs targeting SIRT1 (Ambion s174220), SIRT3 (sc-61556), or with the non-silencing control siRNA (scram) (Ambion) using Lipofectamine™ RNAiMAX (Invitrogen) in culture medium without antibiotics according to the manufacturer's recommendations.

#### **1.4 | Mitochondrial membrane potential (MMP) measurement**

The mitochondrial membrane potential (MMP) of H9c2 cells was assessed with a JC-1 mitochondrial membrane potential assay kit (Abcam, ab113850) according to the manufacturer's instructions. The cells were incubated with 5  $\mu$ M JC-1 dye for 20 minutes at 37°C and then washed twice with 1X dilution buffer. The samples were assessed on a fluorescent plate reader (BioTek). For red fluorescence, the fluorescence intensity was measured at Ex/Em: 525/590 nm. The green fluorescence intensity was measured at Ex/Em: 490/530 nm.

#### **1.5 | Mitochondrial respiration measurements**

The Seahorse XF96 was used to measure the oxygen consumption rate (OCR). Transfected H9c2 cells (6,000/well) were differentiated in customized Seahorse 96-well plates and treated with hypoxia and reoxygenation as described above. After treatment, the medium was replaced with XF Assay Medium (Seahorse Bioscience), supplemented with 1 mM pyruvate, 2 mM glutamine, and 10 mM D-glucose. After placing the cell culture microplate into a 37°C non-CO<sub>2</sub> incubator for 1 hour, OCR was measured using the Seahorse Bioscience XF96 Extracellular Flux Analyzer (Seahorse Bioscience). Measurements were taken as the cells were incubated sequentially under four conditions: (1) basal levels were measured with no additives; (2) oligomycin (1  $\mu$ M) was added to reversibly inhibit ATP synthase and OXPHOS, showing glycolysis alone; (3) FCCP (2  $\mu$ M), a mitochondrial uncoupler, was added to induce maximal respiration; and (4) Rotenone/antimycin A (0.5  $\mu$ M), a Complex I inhibitor and mitochondrial poison, was added to end the reaction. The Seahorse software was used to plot the results. OCR was normalized to cell protein concentration per well.

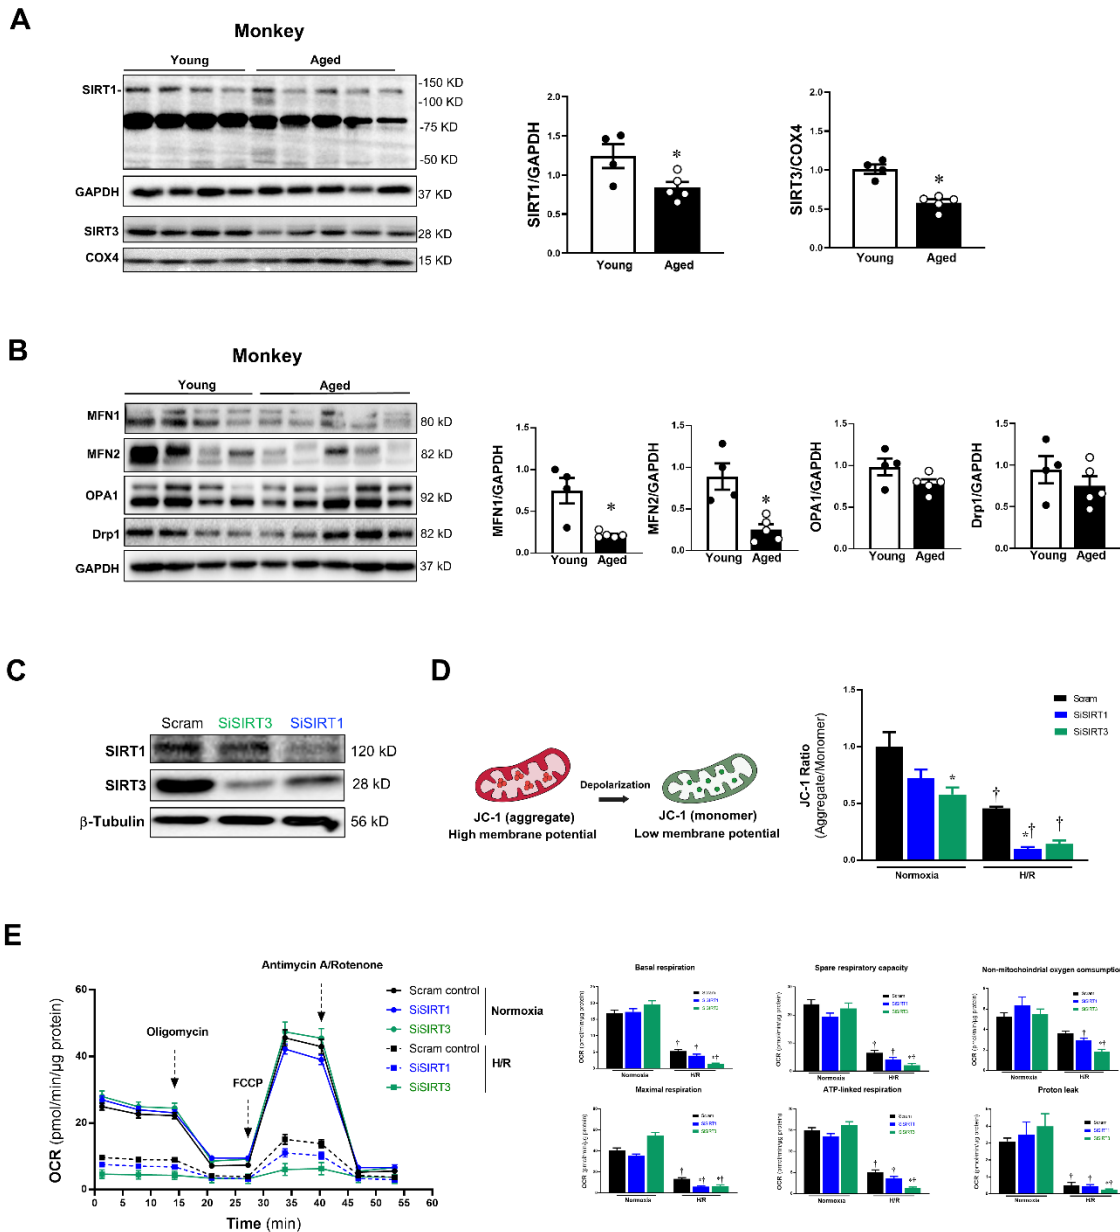

**Suppl Figure 1. Deficiency of SIRT1 and SIRT3 cause alterations in mitochondria homeostasis with aging in monkey hearts and under H/R stress in H9c2 cells.** (A) Immunoblotting showed the protein expression levels of SIRT1 and SIRT3 were decreased with aging in the monkey hearts under physiological condition. Values are mean  $\pm$  SEM. N=4-5, \* $p$ <0.05 vs. young. (B) Immunoblotting showed the expression level of mitochondria dynamics-related protein MFN1, MFN2 was decreased with aging in the monkey whole hearts under the physiological condition with unchanged OPA1 and Drp1 expression. Values are mean  $\pm$  SEM. N=4-5, \* $p$ <0.05 vs. young. (C) The representative protein expression level of SIRT1 and SIRT3 in H9c2 cells treated with SIRT1 siRNA or SIRT3 siRNA. (D) The mitochondrial membrane potential was evaluated by JC-1 staining. Values are mean  $\pm$  SEM. Three independent experiment for each group, with N>=3 replicates, \* $p$ <0.05 vs. scram; † $p$ <0.05 vs. normoxia, respectively. (E) Mitochondrial respiration measurements of OCR were performed with a Seahorse metabolic analyzer. Oligomycin (1  $\mu$ M), FCCP (2  $\mu$ M), and rotenone (0.5  $\mu$ M) combined with antimycin (0.5  $\mu$ M) were added sequentially to H9c2 cells treated with SIRT1 siRNA or SIRT3 siRNA under normoxia and H/R conditions. Quantitative analysis of mitochondrial function parameters (basal respiration, maximal respiration, spare respiratory capacity, ATP-linked respiration, non-mitochondrial oxygen consumption and proton leak) are shown in the bar charts. Values are mean  $\pm$  SEM. N>=3 biological replicates, \* $p$ <0.05 vs. scram; † $p$ <0.05 vs. normoxia, respectively.

**Suppl Table 1.** Echocardiographic measurements of mouse hearts functions under either sham or ischemia (30 min)/reperfusion (6 h) (I/R) conditions.

| Group             | Young (4-6 months)<br>(C57BL/6J) |              | Aged (24-26 months)<br>(C57BL/6J) |              | SIRT1 <sup>ff</sup> (4-6 months)<br>(C57BL/6J) |               | icSIRT1 <sup>-/-</sup> (4-6 months)<br>(C57BL/6J) |              | SIRT3 <sup>ff</sup> (4-6 months)<br>(C57BL/6J) |              | cSIRT3 <sup>-/-</sup> (4-6 months)<br>(C57BL/6J) |              |
|-------------------|----------------------------------|--------------|-----------------------------------|--------------|------------------------------------------------|---------------|---------------------------------------------------|--------------|------------------------------------------------|--------------|--------------------------------------------------|--------------|
|                   | Sham                             | I/R          | Sham                              | I/R          | Sham                                           | I/R           | Sham                                              | I/R          | Sham                                           | I/R          | Sham                                             | I/R          |
| <b>HR</b>         | 413.45±36.02                     | 426.45±34.06 | 399.67±12.05                      | 412.79±67.19 | 427.43±43.78                                   | 396.08± 19.03 | 392.36±27.68                                      | 428.37±20.31 | 403.00±34.24                                   | 437.11±79.82 | 388.45±45.17                                     | 431.25±78.72 |
| <b>CO</b>         | 14.58±2.60                       | 11.22±4.07*  | 13.99±2.38                        | 10.94±2.91*  | 14.57±3.33                                     | 13.58±3.74    | 12.78±3.36†                                       | 11.41±1.68†  | 15.35±2.45                                     | 11.64±5.89*  | 14.42±3.43                                       | 9.95±5.93*†  |
| <b>LV Mass</b>    | 121.06±25.55                     | 133.12±29.23 | 164.39±30.03                      | 145.04±26.96 | 137.27±30.49                                   | 160.7±65.73   | 184.53±56.89                                      | 168.52±43.09 | 126.95±15.61                                   | 126.39±9.63  | 126.23±9.09                                      | 137.53±12.59 |
| <b>SV</b>         | 35.79±8.70                       | 26.48±9.92   | 34.91±5.20                        | 27.50±9.45   | 36.00±7.56                                     | 34.9±7.06     | 32.97±6.89                                        | 26.68±4.04   | 38.13±5.50                                     | 27.16±12.79  | 37.82±0.94                                       | 23.26±13.21  |
| <b>LVAW;s</b>     | 1.31±0.19                        | 1.16±0.30    | 1.48±0.18                         | 1.11±0.19    | 1.35±0.20                                      | 1.39±0.37     | 1.42±0.15                                         | 1.30±0.36    | 1.18±0.16                                      | 1.18±0.14    | 1.26±0.16                                        | 1.32±0.18    |
| <b>LVAW;d</b>     | 0.82±0.12                        | 0.90±0.18    | 1.09±0.18                         | 0.85±0.18    | 0.94±0.14                                      | 0.98±0.31     | 1.10±0.15                                         | 1.10±0.28    | 0.81±0.10                                      | 0.92±0.05    | 0.86±0.12                                        | 1.07±0.16    |
| <b>LVPW;s</b>     | 1.41±0.24                        | 1.12±0.24    | 1.49±0.25                         | 1.19±0.47    | 1.52±0.16                                      | 1.51±0.47     | 1.51±0.30                                         | 1.35±0.36    | 1.16±0.16                                      | 1.19±0.12    | 1.21±0.11                                        | 1.45±0.44    |
| <b>LVPW;d</b>     | 0.97±0.19                        | 0.91±0.20    | 1.14±0.24                         | 0.99±0.39    | 1.09±0.15                                      | 1.13±0.41     | 1.19±0.20                                         | 1.07±0.29    | 0.85±0.16                                      | 0.94±0.18    | 0.87±0.17                                        | 1.13±0.28    |
| <b>Volume;s</b>   | 23.39±10.40                      | 41.12±13.28  | 24.73±7.76                        | 47.44±15.93  | 17.28±6.17                                     | 26.45±11.7    | 30.85±15.14                                       | 37.37±14.20  | 35.71±12.12                                    | 31.56±5.92   | 30.74±7.92                                       | 23.34± 8.81  |
| <b>Volume;d</b>   | 59.18±16.56                      | 67.6±22.78   | 59.64±9.36                        | 74.94±23.56  | 53.28±9.16                                     | 61.35±10.65   | 63.82±18.08                                       | 64.05±15.55  | 73.84±15.73                                    | 58.72±13.83  | 68.56±16.41                                      | 46.6±17.29   |
| <b>Diameter;s</b> | 2.49±0.50                        | 3.17±0.45    | 2.58±0.35                         | 3.36±0.51    | 2.23±0.32                                      | 2.63±0.46     | 2.74±0.73                                         | 3.04±0.50    | 2.99±0.42                                      | 2.87±0.22    | 2.83±0.31                                        | 2.50±0.44    |
| <b>Diameter;d</b> | 3.70±0.46                        | 3.89±0.61    | 3.73±0.24                         | 4.07±0.58    | 3.56±0.26                                      | 3.77±0.28     | 3.81±0.50                                         | 3.83±0.41    | 4.07±0.37                                      | 3.69±0.37    | 3.94±0.40                                        | 3.33±0.53    |

**Note:** HR, Heart rate; CO, Cardiac output; SV, Stroke volume; **IVAW;s**, Left ventricular end-systolic anterior wall thickness (systolic); **IVAW;d**, Left ventricular end-diastolic anterior wall thickness (diastolic); **IVCT**, Isovolumic contraction time; **LVPW;s**, Left ventricular posterior wall (systolic); **LVPW;d**, Left ventricular posterior wall (diastolic); **Volume;s**, Left ventricular end-systolic volume (systolic); **Volume;d**, Left ventricular end-diastolic volume (diastolic); **Diameter;s**, left ventricular internal dimension at end systole; **Diameter;d**, left ventricular internal dimension at end diastole. N=6, Values are expressed as mean ± SD. \*p<0.05 vs. sham, †p<0.05 vs. young, SIRT1<sup>ff</sup>, SIRT3<sup>ff</sup>, respectively.
